# Supplementary material for: Effect of Early vs Late Supplemental Parenteral Nutrition in Patients Undergoing Abdominal Surgery: A Randomized Clinical Trial
Source: PubMed Central journal article supplement (PMC8928091; doi:10.1001/jamasurg.2022.0269), 2022-03-16
Supplement: jamasurg-e220269-s001.pdf [file jamasurg-e220269-s001.pdf]

---

1           **Early versus late supplemental parenteral nutrition in abdominal surgery**  
2                               **patients: a randomized controlled clinical trial**

3  
4   **Summary**

Title:                                       Early versus late supplemental parenteral nutrition in abdominal surgery patients: a randomized controlled clinical trial

Proposed indications:               Supplemental parenteral nutrition

Study objective:                       In this study, we compared the effects of initiating SPN early (day 3 after surgery) and late (day 8 after surgery) on the incidence of nosocomial infections in major abdominal surgery patients at high nutritional risk and poor tolerance to enteral nutrition.

Study design:                          A prospective, randomized controlled, multicenter clinical trial

Study centers:                          11 centers

Investigational product:              Early supplemental parenteral nutrition group (Day 3 100% of energy target after surgery)

Control product:                       Late supplemental parenteral nutrition group (Day 8 100% of energy target after surgery)

Sample size:                            230 (115 × 2 )

- Inclusion criteria:
1. Age: 18-80 years
  2. Patients undergoing elective major abdominal surgery (elective gastric, colorectal, hepatic, and pancreatic resections for both benign and malignant disease) for nontraumatic reasons
  3. Nutritional risk screening 2002 (NRS 2002) score of  $\geq 3$
  4. Patients receiving EN after major abdominal surgery and unable to tolerate 30% of the energy target via enteral feeding on postoperative day 2 and are expected to have a postoperative hospital stay for longer than 7 days.

- Exclusion criteria:
1. Psychiatric disorders
  2. Pregnancy or breastfeeding women
  3. Severe malnutrition
    - a. Weight loss  $>10\%$ – $15\%$  in 6 months
    - b. Body mass index  $< 18.5$

- c. PG-SGA score with stage C
  - d. Albumin < 30 g/L
4. Unstable vital signs or unstable hemodynamics (defined as systolic blood pressure < 90 mm Hg or mean arterial pressure < 70 mm Hg after rapid infusion of 500 mL of crystal or 200 mL of gel, or 50% increase in vascular active drug infusion rate in an hour)
  5. Refusal to participate in the study
  6. Pre-existing infection (confirmed or strongly suspected infection episodes before randomization)
  7. Mortality rates are expected to be more than 50% in 6 months with malignant or irreversibility diseases
    - a. Cancer in the terminal stage
    - b. HIV positive at end-stage or CD<sub>4</sub> < 50/mm<sup>3</sup>
    - c. Cardiopulmonary resuscitation before cardiac arrest and nervous system function not fully recovered
    - d. Class IV limitation of physical activity defined by the New York Heart Association
    - e. Relying on the breathing machine because of chronic diseases
  8. Life expectancy of dying patients less than 24 h
  9. Refractory shock to meet any of the following conditions:
    - a. Infusion rate of dopamine > 15 µg/(kg. min)
    - b. Infusion rate of dobutamine > 15 µg/(kg .min)
    - c. Infusion rate of epinephrine and norepinephrine > 30 µg/min
    - d. Infusion rate of phenylephrine > 50 µg/min
    - e. Infusion rate of milrinone > 0.5 µg/kg/min
    - f. Infusion rate of vasopressin > 0.04 U/min
    - g. Inter-aortic balloon pump
  10. Hepatic insufficiency (alanine/aspartate transaminase/bilirubin 200% above the normal range)
  11. Renal insufficiency (creatinine 200% above the normal range)
  12. Metabolic diseases (hyperthyroidism, hypothyroidism, type 1 diabetes mellitus, Wilson disease, phenylketonuria, and adrenal cortex disorders)
  13. EN can reach 30% of target energy in day 2 after surgery

- 
14. Burn area exceeding 20% of the patient's body surface
  15. Autoimmune diseases (systemic lupus erythematosus, Sjogren's syndrome, and dermatomyositis)
  16. History of organ transplantation (liver, kidney, heart, and lung transplantation)
  17. International standardization ratio more than 3.0 or platelet count <math>< 30,000 \text{ cells/mm}^3</math>
  18. Intracranial hemorrhage 1 month before enrolment
  19. History of severe allergy against ingredients of enteral and parenteral nutrition
  20. Already participated in another clinical trial
  21. Nutritional support therapy started before enrolment
  22. Type 2 diabetes mellitus (under intensive medical treatment or insulin treatment)

Primary endpoints: Morbidity of infection

Secondary endpoints: Actual calories intake and protein intake, the incidence of gastrointestinal intolerance (diarrhea, vomiting, abdominal distention, constipation, and abdominal pain) and parenteral nutrition-related complications (hyperglycemia, hypoglycemia, hyperlipidemia), postoperative non-infectious complications, length of hospital stay, hospitalization expenses, therapeutic antibiotic days (defined as days from postoperative day 3 to discharge during which a patient received at least one dose of antibiotics for actual nosocomial infection), prophylaxis antibiotic days (defined as days antibiotics were used for prophylaxis (no infection)), mechanical ventilation, mortality within 2 months after randomization, and lab tests at discharge including white blood cell, C-reactive protein, glucose, albumin, prealbumin, retinol-binding protein, transferrin, total cholesterol, triglycerides, hepatic and renal functions

Treatment duration: 5 days

Preservation of clinical data and results: During the clinical trial, all the information of the trial should be kept by the principal investigator at each study center.

---

5

6 **Aims**

7 To compare the effect of initiating supplemental parenteral nutrition (SPN) early (day 3 after surgery)  
 8 and late (day 8 after surgery) among abdominal surgical patients at high nutritional risk and poor  
 9 tolerance to enteral nutrition.

10 **Study Design, Materials, and Methods**

11 ***Study design***

12 PNASIT is a prospective, multicenter, randomized controlled trial with an open intervention comparing  
13 the effects of initiating early SPN with those of initiating late SPN after major abdominal surgery in  
14 whom energy targets cannot be met by enteral nutrition alone.

15 ***Setting and patient eligibility for inclusion and recruitment***

16 The multicenter trial included 11 hospitals including Jinling Hospital, Peking Union Medical College  
17 Hospital, Chinese PLA General Hospital, Xijing Hospital, West China Hospital, Xinqiao Hospital of  
18 Chongqing, Changhai Hospital, Shanghai 10th People's Hospital, The Second Affiliated Hospital of  
19 Harbin Medical University, The Affiliated Hospital of Qingdao University, and The First Affiliated  
20 Hospital of Kunming Medical College. Upon hospital admission and 2nd day after surgery, consecutive  
21 adult in patients undergoing abdominal surgery was screened for nutrition risk by the nursing and/or  
22 physician staff, using the Nutritional Risk Screening (NRS) 2002.

23 Patients were eligible after surgery if they fulfilled the following inclusion criteria:

1. Age: 18-80 years
2. Undergoing elective major abdominal surgery (elective gastric, colorectal, hepatic, and pancreatic resections for both benign and malignant disease) for nontraumatic reasons
3. NRS 2002 score of  $\geq 3$
4. Patients receiving EN after major elective abdominal surgery and unable to tolerate 30% of the target targets via enteral feeding on postoperative day 2 and are expected to have a postoperative hospital stay for longer than 7 days.

The exclusion criteria were as follow:

- 24 1. Psychiatric disorders
- 25 2. Pregnancy or breastfeeding women
- 26 3. Malnutrition
  - 27 a. Weight loss  $>10\%$ – $15\%$  in 6 months
  - 28 b. Body mass index (BMI)  $<18.5$
  - 29 c. SGA score with stage C
  - 30 d. Albumin  $<30$  g/L
- 31 4. Unstable vital signs or unstable hemodynamics (defined as systolic blood pressure  $<90$  mm Hg or  
32 mean arterial pressure  $<70$  mm Hg after rapid infusion of 500 mL of crystal or 200 mL of gel, or  
33 50% increase in vascular active drug infusion rate in an hour)
- 34 5. Refusal to participate in the study
- 35 6. Pre-existing infection (confirmed or strongly suspected infection episodes before  
36 randomization)
- 37 7. Pre-existing condition with expected 6-month mortality  $>50\%$ 
  - 38 a. Cancer in the terminal stage
  - 39 b. HIV positive at end-stage or CD4  $<50/\text{mm}^3$
  - 40 c. Cardiopulmonary resuscitation before cardiac arrest and nervous system function  
41 not fully recovered
  - 42 d. Class IV limitation of physical activity defined by the New York Heart Association

- 
- 43 e. Relying on the breathing machine because of chronic diseases
- 44 8. Life expectancy less than 24 h of dying patients
- 45 9. Refractory shock to the receipt of vasopressors at the following doses:
- 46 a. dopamine  $>15 \mu\text{g}/(\text{kg} \cdot \text{min})$
- 47 b. dobutamine  $>15 \mu\text{g}/(\text{kg} \cdot \text{min})$
- 48 c. epinephrine and norepinephrine  $>30 \mu\text{g}/\text{min}$
- 49 d. phenylephrine  $>50 \mu\text{g}/\text{min}$
- 50 e. milrinone  $>0.5 \mu\text{g}/(\text{kg} \cdot \text{min})$
- 51 f. vasopressin  $> 0.04 \text{ U}/\text{min}$
- 52 g. receipt inter-aortic balloon pump
- 53 10. Hepatic insufficiency (defined as alanine/aspartate transaminase/bilirubin 200% above the
- 54 normal range)
- 55 11. Renal insufficiency (defined as creatinine 200% above the normal range)
- 56 12. Metabolic diseases (hyperthyroidism, hypothyroidism, type 1 diabetes mellitus, Wilson disease,
- 57 phenylketonuria, and adrenal cortex disorders)
- 58 13. EN reaching 30% of target energy on day 2 after surgery
- 59 14. Burn area exceeding 20% of the patient's body surface
- 60 15. Autoimmune diseases (systemic lupus erythematosus, Sjogren's syndrome, and
- 61 dermatomyositis)
- 62 16. History of organ transplantation (liver, kidney, heart, and lung transplantation)
- 63 17. International standardization ratio more than 3.0 or platelet count  $<30,000 \text{ cells}/\text{mm}^3$
- 64 18. Intracranial hemorrhage 1 month before enrolment
- 65 19. History of severe allergy against ingredients of enteral nutrition and parenteral nutrition
- 66 20. Previous enrolment in another study within the same hospital admission
- 67 21. Nutritional support therapy before enrolment
- 68 22. Diabetes mellitus (under intensive medical treatment or insulin treatment)

69 ***Data collection at study entry***

70 All baseline assessments were obtained after obtaining informed consent from the patients or their

71 legally authorized representative, but prior to the initiation of study procedures. Baseline assessments

72 were made before surgery. If more than one value was available for this period, the value closest to the

73 time of randomization was used. If no values were available from 24 h prior to randomization, then the

74 values were measured during 6 h after randomization but prior to the initiation of intervention. The

75 baseline assessments included the following:

- 76 1. Sociodemographic and baseline characteristics (age, sex, weight, and height for calculation of
- 77 BMI, NRS 2002, disease diagnosis, surgical procedure, malignancy, and comorbidity)
- 78 2. The surgery duration, operative blood loss, operative characteristics (site and technique),
- 79 intraoperative contamination, and the frequency and amount of homologous blood transfusions
- 80 3. Hematological index (albumin, pre-albumin, transferrin, retinol-binding protein, glucose,
- 81 cholesterol, triglyceride, HDL, LDL, white blood cell, CRP, hepatic and renal function)
- 82 4. Energy targets
- 83 5. Medical diagnoses according to the ICD10-codes

84 During the study period, all patients were assessed daily by two physicians to evaluate nutritional

85 intake and whether nutritional targets were met. The actual energy and protein intakes each day in the  
86 intervention period were recorded.

87 Blood samples were systematically collected upon study inclusion and at discharge for later batch  
88 measurement of nutritional markers and other biomarkers. Postoperative prophylactic antibiotic therapy  
89 was administered to all patients as part of usual clinical practice. Also, hospital stay, occurrence of  
90 mechanical ventilation, intensive care unit (ICU) admission, mortality within 2 months after  
91 randomization, and frequency of gastrointestinal intolerance events (diarrhea, vomiting, abdominal  
92 distention, constipation, and abdominal pain) and parenteral nutrition-related complications  
93 (hyperglycemia, hypoglycemia, and hyperlipidemia) were recorded during the intervention.

#### 94 ***Nutritional support protocol***

95 The nutritional support protocol, including nutritional treatments and measures designed to evaluate  
96 gastrointestinal intolerance, was standardized as follows.

#### 97 ***General principles of nutritional support in both study arms***

98 The start of enteral feeding was encouraged as soon as possible after surgery and no later than 24 h.  
99 The caloric target for each participant was estimated based on the ideal body weight as 30 kcal/kg of  
100 the ideal body weight for men and 25 kcal/kg of the ideal body weight for women, and the protein  
101 requirements as 1.2 g/kg of ideal body weight on the day of surgery (day 0). This plan was initially  
102 based on oral nutritional supplements, and the patients were allowed to have an oral diet provided by  
103 the hospital kitchen according to patient preferences. Tube feeding was implemented if the patient  
104 could not tolerate oral feeding or the energy target could not be reached by oral feeding. The type of  
105 enteral feeding tube (nasogastric tube, nasointestinal tube, and jejunostomy) was determined by the  
106 patient's primary medical team. Tube feeding started at the flow rate (in milliliters per hour) required to  
107 achieve the energy target. The enteral feeding was delivered continuously over the 24-h cycle without  
108 interruption. Eligible patients who couldn't achieve 30% of the energy requirement on a postoperative  
109 day 2 were randomized to two arms. The intervention group who received early SPN (E-SPN group)  
110 started achieving 100% of the caloric requirements via early EN combined with early supplemental  
111 parenteral nutrition on postoperative day 3. The patients in the control group who received late SPN  
112 (L-SPN group) started achieving 100% of the caloric requirements via early EN combined with late  
113 supplemental parenteral nutrition on postoperative day 8. After randomization, both groups received  
114 nutritional support for a minimum of 5 days, or until the transition to 80% of caloric requirements via  
115 an enteral feeding, or until hospital discharge.

116 Actual energy delivery was monitored regularly by comparing with the predefined daily calorie targets.  
117 Any interruption in energy delivery was reported to the physicians in charge. Usually, nutritional  
118 support was not interrupted while transporting the patient. However, when EN was interrupted (for  
119 example, a specific gastrointestinal or radiological investigation for a gastrointestinal intolerance event),  
120 the flow rate was not increased to compensate for the interruption. All patients were kept in the  
121 semi-recumbent supine position.

#### 122 ***Nutritional formulas***

123 All patients received commercially available standardized enteral nutrition formulas. The EN products  
124 comprising polymeric formulas were routinely prescribed at all hospitals, which contained 1 kcal/mL  
125 of energy (16% proteins, 35% lipids, and 49% carbohydrates). PN formulas consisted of 0.88 kcal/mL  
126 of energy (15% proteins, 40% lipids [20% long-chain triglycerides], and 45% carbohydrates) and

---

127 supplemental vitamins and minerals. PN infusion was administered via the peripheral or central veins.

128 ***Additional intakes***

129 Patients who were assigned to the L-SPN group received 5% glucose saline and saline solution in a  
130 volume equal to that of the SPN administered in the early initiation group in order to provide adequate  
131 hydration, with the delivered volume of EN taken into account according to the needs of each  
132 participant as assessed by the physicians in charge and in compliance with standard practice at each  
133 center.

134 ***Complications possibly related to nutrition management***

135 In order to monitor the quality of the enteral and parenteral nutrition management during the study we  
136 will register all known complications possibly related to them.

137 ***Complications possibly related to enteral feeding***

138 Gastrointestinal intolerance: diarrhea, vomiting, abdominal distention, constipation, and abdominal  
139 pain.

140 Complicated insertion of feeding tubes: nasal bleeding.

141 Mechanical complications: feeding tube displacement or obstruction.

142 ***Complications possibly related to parenteral feeding***

143 Mechanical complications: occlusion and dislodging of central venous catheters.

144 Clinical complications: pneumothorax, hemothorax, and subclavian artery, liver function abnormalities,  
145 hyperlipidemia, hyperglycemia, central line replacement due to suspicion of blood stream-related  
146 infections (BSRI).

147 ***Parenteral nutrition-related complications***

148 Including hyperglycemia, hypoglycemia, and hyperlipidemia. Hypoglycemia resistance to parenteral  
149 glucose administration as a result of prolonged hypocaloric feeding will be considered a serious  
150 adverse event.

151 The principles implemented for blood glucose monitoring and management are as follows:

- 152 • Regular blood glucose levels were monitored once a day before surgery and three times a day after  
153 surgery.
- 154 • In the early stage of supplemental parenteral nutrition, blood glucose levels were monitored every  
155 6 h and twice a day after stable blood glucose levels were achieved.
- 156 • The diagnostic criterion for parenteral nutrition-related hyperglycemia was the measurement of  
157 blood glucose levels >180 mg/dL (10 mmol/L).
- 158 • The number of occurrences of hyperglycemia and hypoglycemia during supplemental parenteral  
159 nutrition intervention was recorded.

160 ***Gastrointestinal intolerance monitoring***

161 Gastrointestinal tolerance was assessed based on episodes of significant vomiting (defined as the  
162 expulsion of gastric contents from the oro- or nasopharynx), abdominal distention (defined as the  
163 presence of a tense or rigid abdomen with guarding or rebound on examination), diarrhea (more than  
164 300 mL of liquid stool or more than four loose stools per day), constipation (no stool for more than 6  
165 days), and abdominal pain (defined as feeling pain anywhere between the chest and the groin). Patients  
166 were monitored for gastrointestinal intolerances by the medical team every 6 h when the rates were  
167 stable and every 2 h for any gastrointestinal intolerance until it disappeared. They could evaluate  
168 patients more frequently if warranted by the clinical condition. A predefined protocol was used to

169 manage gastrointestinal intolerance. In cases of vomiting, a prokinetic agent was administered first  
170 after confirming the absence of any contraindications. The decision to use prokinetic agents was left to  
171 the discretion of the medical team. The prokinetic agent was continued until EN at the highest  
172 prescribed flow rate was well tolerated for 24 h. Then, the prokinetic agent was discontinued. If the  
173 intolerance persisted despite prokinetic therapy, feeds were held for 2 h. Feeding was restarted at a rate  
174 10 mL/h slower than previously after 2 h and confirmation of the resolution of the signs of intolerance.  
175 When abdominal distention occurred, the enteral feeding rate was decreased by 10 mL/h. Further, the  
176 patient was reevaluated every 2 h until distention improved, and then the rates were increased to  
177 previous rates. For diarrhea, the medical team was encouraged to minimize offending medications and  
178 initiate pharmacologic treatments. If diarrhea became worse, then enteral feeding was interrupted.  
179 When abdominal pain was reported, EN was continued and reevaluated every 2 h until it improved. If  
180 the abdominal pain became worse, EN was stopped and an abdominal radiograph examination was  
181 performed. After confirmation of the resolution of the signs of intolerance, feeds were restarted at the  
182 highest prescribed flow rate. The primary team interrupted or halted enteral feeding if it was thought  
183 necessary for the patient's health.

#### 184 **Study endpoints**

185 All patients were daily assessed until hospital discharge and contacted after discharge via telephone for  
186 a structured interview by blinded study nurses to assess mortality within 2 months after randomization.

#### 187 *Primary outcomes*

188 The primary outcome was morbidity of infection that occurred between postoperative day 3 and  
189 discharge. Infections were defined according to the Centers for Disease Control and Prevention. Six  
190 infection categories were defined: bloodstream infections (laboratory-confirmed bloodstream infections  
191 and clinical sepsis), pneumonia (clinically defined pneumonia, pneumonia with specific laboratory  
192 findings, ventilator-associated pneumonia, and other lower respiratory tract infections), urinary tract  
193 infections (symptomatic urinary tract infection and other infections of the urinary tract), surgical site  
194 infections (superficial or deep incisional surgical site infections), abdominal infections (organ/space  
195 surgical site infections at the intraabdominal specific site), and other infections (skin and soft tissue  
196 infection)

#### 197 *Secondary outcomes*

198 The secondary endpoints were the actual caloric and protein intakes each day during an intervention,  
199 length of hospital stay, hospitalization expenses, the occurrence of mechanical ventilation, ICU  
200 admission, postoperative noninfectious complications, therapeutic antibiotic days (defined as days from  
201 postoperative day 3 to discharge during which a patient received at least one dose of antibiotics for  
202 actual nosocomial infection), prophylaxis antibiotic days (defined as days antibiotics were used for  
203 prophylaxis (no infection)), mortality within 2 months after randomization, and concentrations of  
204 albumin, pre-albumin, transferrin, and retinol-conjugated protein, white blood cell, C-reactive protein,  
205 glucose, cholesterol, triglyceride, LDL, HDL, AST, ALT, ALP, TBiL, urea nitrogen, and creatinine at  
206 discharge. Gastrointestinal intolerance events and their frequency during the intervention were as  
207 follows: diarrhea (more than 300 mL of liquid stool or more than four loose stools per day), vomiting  
208 (defined as the expulsion of gastric contents from the oro-or nasopharynx), abdominal distention  
209 (defined as the presence of a tense or rigid abdomen with guarding or rebound on examination),  
210 constipation (no stool for more than 6 days), and abdominal pain (defined as pain anywhere between



---

211 the chest and the groin) and parenteral nutrition-related complications (including hyperglycemia,  
212 hypoglycemia, hyperlipidemia and so on) during the intervention.

213 ***Randomization***

214 Eligible patients were randomized in a 1:1 fashion into the intervention group or the control group  
215 according to a computer-generated, randomization scheme using SAS 9.4 Statistical Analysis System  
216 (SAS Institute Inc). The randomization was performed using the random block design with block sizes  
217 2, 4, 6, and 8, and stratified for participating centers. A sufficient number of sealed, sequentially  
218 numbered, opaque envelopes were prepared for each center. A randomized competitive enrolment  
219 among different centers was implemented. The participants at each center regularly reported, and no  
220 new participants were enrolled once the targeted sample size was reached. Staff responsible for  
221 randomization will only be responsible for the assignment of random groups and will not be involved  
222 in any specific trial operations.

223 ***Blinding***

224 Blinding the clinical staff to the patient's assigned early or late SPN protocol was not feasible. All  
225 participants and investigators were aware of the group assignment, but the follow-up assessments were  
226 performed by trained physicians and nurses who were blinded to the patient's assignment. Furthermore,  
227 the statisticians are blinded to the treatment groups during the data analysis.

228 ***Informed consent***

229 The research physician investigator explained the objectives of this study and its potential risks and  
230 benefits to the patient or his/her surrogate decision-maker. Once they agreed, written consent was  
231 obtained. The participants could withdraw from the study at any time without any impact on treatment.

232 ***Ethical considerations***

233 This clinical study was conducted in accordance with the Declaration of Helsinki and all applicable  
234 Chinese laws and regulations on clinical trial conduct. The study was approved by the institutional  
235 ethics committees (IEC) of the participating hospitals and conducted in compliance with the protocol  
236 approved by the IEC and according to the international conference of harmonization (ICH)-Good  
237 Clinical Practice standards. Before initiating the study, each of the investigators had written and dated  
238 approval/favorable opinion from their concerned IEC for the study protocol (and any amendments),  
239 written informed consent form, consent form updates, patient recruitment procedures (e.g.,  
240 advertisements), and any other written information to be provided to patients.

241 All enrolled participants were asked to provide written informed consent. For patients who could not  
242 do so due to hypothermia or their acute medical condition, patients' next to kin signed an assent form to  
243 state the presumptive will of the patient. The patient was included in the study only after these  
244 informed consent procedures.

245 ***Statistical analysis***

246 ***Sample size calculation***

247 The incidence of postoperative infectious complications reached 10%-30% among patients undergoing  
248 abdominal surgery. The infection rate was assumed to be 25% in the group that received L-SPN and 10%  
249 in the E-SPN group. The total sample size of 220 was calculated using power analysis & sample size  
250 15.0 software. With a two-tailed type, I error rate of 5%. The sample size was increased to 230 to allow  
251 for withdrawal and loss to follow-up.

252 ***Missing data***

253 Since the primary outcome was the rate of infection, all randomized participants who died during  
254 hospitalization or withdrew from the study were assigned to occurring infection.

255 ***Analysis populations***

256 Intent-to-treat (ITT) set: This set included participants randomized to receive E-SPN in the intervention  
257 arm and those randomized to receive L-SPN in the control arm.

258 Full analysis set (FAS): This set was the same as the ITT population except participants who did not  
259 receive any intervention. This population was the primary population for the primary outcome.

260 Per-protocol set (PPS): This was a subset of the ITT population, including participants who did not  
261 violate the inclusion/exclusion criteria or experience significant protocol deviations. PP analyses were  
262 conducted for all secondary outcomes. Primary outcome analyses were also repeated in the PP  
263 population as sensitivity analyses.

264 Safety set (SS): The set of participants to be summarized was usually defined as randomized  
265 participants who received at least one dose of investigation and a one-time safety assessment after  
266 treatment. The incidence of gastrointestinal intolerance events and other adverse events (the principal  
267 safety outcome) was compared among participants in the safety set.

268 Throughout the analyses, statistical significance was accepted at a *p-value* of .05. All analyses were  
269 performed using SAS software version 9.4 (SAS Institute Inc).

270 ***Demographics and baseline characteristics***

271 Specified demographics and baseline characteristics were presented for the E-SPN and L-SPN groups.  
272 Continuous variables, including age, weight, body mass index, hematological index (albumin,  
273 pre-albumin, transferrin, retinol-binding protein, white blood cell, C-reactive protein, glucose,  
274 cholesterol, triglyceride, LDL, HDL, AST, ALT, ALP, TBiL, urea nitrogen, and creatinine) and energy  
275 goal, were summarized with their means and standard deviation (normal distribution) or medians and  
276 interquartile range (non-normal distribution). Categorical data (sex, NRS 2002, operative site, surgical  
277 procedure, malignancy, surgical stages, intraoperative contamination, duration of operative time, blood  
278 loss, blood transfusion, and comorbidity) were described by the number and percentage of patients.

279 Demographic and baseline variables were compared between the two groups with appropriate  
280 statistical tests to assess the balance of randomization. The Shapiro-Wilk test was used to test the  
281 normality of continuous variables. The student t-test was used for continuous variables, and the Mann–  
282 Whitney U test was used to compare ordinal data. The categorical data were performed using the  
283 Chi-square test or Fisher’s exact test.

284 ***Analyses of efficacy outcome***

285 ***Primary outcome analyses***

286 The main analysis was based on the ITT principle. The primary outcome was the occurrence of  
287 all-cause infection between postoperative day 3 and discharge. Infections were defined according to the  
288 Centers for Disease Control and Prevention. Six infection categories were defined: bloodstream  
289 infections (laboratory-confirmed bloodstream infections and clinical sepsis), pneumonia (clinically  
290 defined pneumonia, pneumonia with specific laboratory findings, ventilator-associated pneumonia, and  
291 other lower respiratory tract infections), urinary tract infections (symptomatic urinary tract infection  
292 and other infections of the urinary tract), surgical site infections (superficial or deep incisional surgical  
293 site infections), abdominal infections (organ/space surgical site infections at the intraabdominal

---

294 specific site), and other infections (skin and soft tissue infection). Meanwhile, the difference and its  
295 two-sided 95% confidence interval (CI) between the two groups were calculated. Primary outcome  
296 analyses were also performed in FAS and PPS populations. In addition, the rate of nosocomial  
297 infections in a time-to-event analysis was reported with the use of Kaplan–Meier plots, and the  
298 difference between the two groups was tested by log-rank test. Cox proportional hazards model was  
299 used to estimate the hazards ratio (HR) and corresponding 95% confidence intervals (CIs). The  
300 subgroup analyses for the primary outcome included the following variables: age (<65 vs.  $\geq$ 65), sex  
301 (male vs. female), NRS2002 score (3 vs.  $\geq$ 4), comorbidity (yes vs. no), cancer (yes vs. no), operation  
302 type (laparotomy vs. laparoscope), operation time ( $\leq$ 5h vs. >5h) and blood loss ( $\leq$  500ml  
303 vs. >500ml).

#### 304 *Secondary efficacy analyses*

305 Secondary outcome measures included the following:

- 306 1. Daily energy received from enteral nutrition (kcal per day)
- 307 2. Daily energy received from parenteral nutrition (kcal per day)
- 308 3. Daily energy received from total nutrition support (kcal per day)
- 309 4. Daily energy received from total nutrition support (kcal/kg per day)
- 310 5. Daily protein from enteral nutrition (g per day)
- 311 6. Daily protein from parenteral nutrition (g per day)
- 312 7. Daily protein from total nutrition support (g per day)
- 313 8. Daily protein from total nutrition support (g/kg per day)
- 314 9. Length of hospital stays
- 315 10. Occurrence of mechanical ventilation
- 316 11. ICU admission
- 317 12. Hospitalization costs
- 318 13. Total antibiotic days (prophylactic antibiotic days and therapeutic antibiotic days)
- 319 14. Adverse effects of artificial nutrition (GI intolerance complications and parenteral  
320 nutrition-related complications)
- 321 15. All-cause mortality within 2 months after randomization
- 322 16. Nutritional indicators (albumin, pre-albumin, transferrin, and retinol-binding protein) at  
323 discharge
- 324 17. Hepatic and renal function(ALT, AST, ALP, TBiL, blood urea nitrogen, and serum  
325 creatinine) at discharge
- 326 18. Metabolism-related index (blood glucose, total cholesterol, triglyceride, HDL, and LDL) at  
327 discharge
- 328 19. Inflammatory biomarkers (white blood cell and C-reactive protein) at discharge
- 329 20. Postoperative non-infectious complication (anastomotic leak, wound dehiscence, bleeding,  
330 intestinal obstruction, hemoperitoneum, arrhythmia, hepatic dysfunction, renal dysfunction,  
331 respiratory failure, pleural effusion, and atelectasis. etc.)

332 Comparisons of secondary outcomes between two arms were performed using the Chi-square test or  
333 Fisher’s exact test as appropriate (#10, #11, #14, #15, and #20). The Student’s test or Mann–Whitney *U*  
334 test was used in the analyses of continuous and ordinal outcome data (#1, #2, #3, #4, #5, #6, #7, #8, #9,  
335 #12, #13, #16, #17, #18, and #19) between the two groups.

336 **Safety analyses**

337 The safety outcome measure was the gastrointestinal intolerance events and parenteral nutrition-related  
338 complications including the following:

- 339 1. Vomiting (expulsion of gastric contents from the oro- or nasopharynx)
- 340 2. Abdominal distention (presence of a tense or rigid abdomen with guarding or rebound on  
341 examination)
- 342 3. Constipation (no stool for more than 6 days)
- 343 4. Diarrhea (more than 300 mL of liquid stool or more than four loose stools per day)
- 344 5. Abdominal pain (feeling pain anywhere between the chest and the groin)
- 345 6. Hyperglycemia (target level for serum glucose of < 180 mg/dL (10 mmol/L))
- 346 7. Hypoglycemia (target level for serum glucose of < 90 mg/dL (3.9 mmol/L))
- 347 8. Hyperlipidemia (triglyceride level should not exceed 400 mg/dL (4.5 mmol/L) during infusion)

348 The number and proportion of the gastrointestinal intolerance events and other adverse events in the  
349 two groups were reported. Since the safety outcome measures were all categorical data, the Chi-square  
350 test or Fisher's exact test was used to analyze the differences between the two treatment groups as  
351 appropriate.

352 **Administrative and legal aspects**

353 Electronic data collection will be used. Data will be collected in an anonymous, CRF, unambiguously  
354 linked to the source file. The sponsor will provide direct access to the CRF, the source data and the  
355 study master file for monitoring, Independent Ethics committee review and regulatory inspection. The  
356 investigator will establish an independent data and safety monitoring board to oversee the study  
357 conduct and review blinded safety data. The investigator appointed two monitors. The monitor will  
358 verify that the trial is performed in accordance with the protocol as described in the China National  
359 Medical Products Administration as well as the Declaration of Helsinki. Monitoring will be performed  
360 and will be reported following the sponsor's SOPs.

361 **Study personnel**

362 A list of all study personnel and investigators will be updated in the study master file.

363 All investigators not directly involved in the patients' care will be blinded to treatment allocation:

364 Statisticians

365 Microbiologists

366 Pathologists

367 ....

368

369

370

371

372

373

374

375

376

377

378  
379  
380  
381  
382  
383  
384

### Appendix 1: Trial design

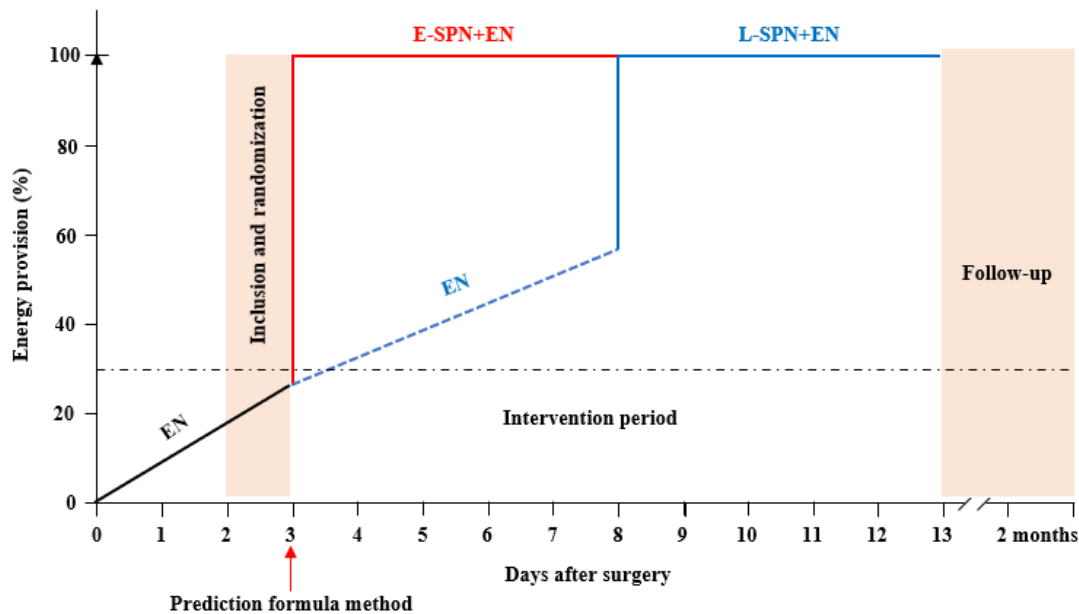

385  
386  
387  
388  
389  
390  
391  
392  
393  
394  
395  
396  
397  
398  
399  
400  
401  
402  
403  
404  
405

The black solid line shows the potential progression of EN in all patients before inclusion into the trial (Day 2), and the red line shows the energy delivery in patients on EN with E-SPN during the intervention period (Days 3-12), resulting in the potential prescription of 100% of the energy target (determined by prediction formula, 2 days after surgery). The blue broken line shows the potential energy provision for patients remaining on EN only (Days 3-7), and the blue solid line the energy delivery in patients on EN with L-SPN during the intervention period (Days 8-12), resulting in the potential prescription of 100% of the energy target. EN=enteral nutrition, E-SPN=early supplemental parenteral nutrition, L-SPN=late supplemental parenteral nutrition.

406  
407  
408  
409  
410  
411  
412

**Appendix 2: Protocol for nutritional screening**

| Nutritional risk screening(NRS 2002)                                                                                                                                                                                                                                                                               |                                                                                                                                                                   |                                                 |                                                                                                                                            |
|--------------------------------------------------------------------------------------------------------------------------------------------------------------------------------------------------------------------------------------------------------------------------------------------------------------------|-------------------------------------------------------------------------------------------------------------------------------------------------------------------|-------------------------------------------------|--------------------------------------------------------------------------------------------------------------------------------------------|
| Impaired nutritional status                                                                                                                                                                                                                                                                                        |                                                                                                                                                                   | Severity of disease (=increase in requirements) |                                                                                                                                            |
| Absent <b>Score 0</b>                                                                                                                                                                                                                                                                                              | Normal nutritional status                                                                                                                                         | Absent <b>Score 0</b>                           | Normal nutritional requirements                                                                                                            |
| Mid <b>Score 1</b>                                                                                                                                                                                                                                                                                                 | Wt loss > 5% in 3 mths or Food intake below 50-75% of normal requirement in preceding week                                                                        | Mid <b>Score 1</b>                              | Hip fracture* Chronic patients, in particular with acute complications: cirrhosis*, COPD*, <i>Chronic hemodialysis, diabetes, oncology</i> |
| Moderate <b>Score 2</b>                                                                                                                                                                                                                                                                                            | Wt loss > 5% in 2 mths or BMI 18.5 - 20.5 + impaired general condition or Food intake 25-50% of normal requirement in preceding week                              | Moderate <b>Score 2</b>                         | Major abdominal surgery* Stroke* <i>Severe pneumonia, hematological malignancy</i>                                                         |
| Severe <b>Score 3</b>                                                                                                                                                                                                                                                                                              | Wt loss > 5% in 1 mth (> 15% in 3 mths) or BMI < 18.5 + impaired general condition or Food intake 0-25% of normal requirement in preceding week in preceding week | Severe <b>Score 3</b>                           | Head injury* Bone marrow transplantation* <i>Intensive care patients (APACHE &gt; 10).</i>                                                 |
| <b>Score:</b> +                                                                                                                                                                                                                                                                                                    |                                                                                                                                                                   | <b>Score:</b> = <b>Total score</b>              |                                                                                                                                            |
| Age                                                                                                                                                                                                                                                                                                                | If 70 years: add 1 to total score above                                                                                                                           | = age adjusted total score                      |                                                                                                                                            |
| <p><b>Score 3:</b> the patient is nutritionally at-risk and a nutritional care plan is initiated.<br/> <b>Score &lt; 3:</b> weekly re-screening of the patient. E.g., if the patient is scheduled for a major operation, a preventive nutritional care plan is considered to avoid the associated risk status.</p> |                                                                                                                                                                   |                                                 |                                                                                                                                            |

413  
414  
415  
416  
417  
418  
419  
420  
421  
422  
423  
424  
425

**NRS-2002** is based on an interpretation of available randomized clinical trials.

\*Indicates that a trial directly supports the categorization of patients with that diagnosis. Diagnosis shown in italics is based on the prototypes given below.

**Nutritional risk** is defined by the present nutritional status and risk of impairment of present status, due to increased requirements caused by stress metabolism of the clinical condition.

**A nutritional care plan** is indicated in all patients who are (1) severely undernourished (score=3), or (2) severely ill (score=3), or (3) moderately undernourished + mildly ill (score 2+1), or (4) mildly undernourished + moderately ill (score 1+2).

**Prototypes for severity of disease**

**Score=1:** a patient with chronic disease, admitted to hospital due to complications. The patient is weak but out of bed regularly. Protein requirement is increased but can be covered by oral diet or supplement in most cases.

**Score=2:** a patient confined to bed due to illness, e.g., following major abdominal surgery. Protein

---

426 requirement is substantially increased, but can be covered, although artificial feeding is required in  
427 many cases.

428 **Score=3:** a patient in intensive care with assisted ventilation etc. Protein requirement is increased and  
429 cannot be covered even by artificial feeding. Protein breakdown and nitrogen loss can be significantly  
430 attenuated.

431

432 **Appendix 3: Formula for calculating Ideal Body Weight (IBW)**

433 Female:  $IBW = 45.5 + [0.91 * (\text{Height cm} - 152.4)]$

434 Male:  $IBW = 50 + [0.91 * (\text{Height cm} - 152.4)]$

435 Corrected Ideal body weight

436 If  $18.5 \leq BMI \leq 27$ , IBW

437 If  $BMI > 27$ ,  $IBW * 1.2$
