# Supplementary material for: Effect of Early vs Late Supplemental Parenteral Nutrition in Patients Undergoing Abdominal Surgery: A Randomized Clinical Trial
Source: PubMed Central journal article supplement (PMC8928091; doi:10.1001/jamasurg.2022.0269), 2022-03-16
Supplement: jamasurg-e220269-s003.pdf [file jamasurg-e220269-s003.pdf]

## Data Sharing Statement

### Data

**Data available:** Yes

**Data types:** Deidentified participant data

**How to access data:** [wangxinying@nju.edu.cn](mailto:wangxinying@nju.edu.cn)

**When available:** With publication

### Supporting Documents

**Document types:** Statistical/analytic code, Informed consent form

**How to access documents:** The request for the analytic code shall be sent to Prof. Xinying Wang, Email-address: [wangxinying@nju.edu.cn](mailto:wangxinying@nju.edu.cn)

**When available:** With publication

### Additional Information

**Who can access the data:** Data will be made available to researchers who provide a methodologically sound proposal to achieve aims in the approved proposal

**Types of analyses:** Specified purposes only

**Mechanisms of data availability:** Signed data access agreement
